# Supplementary material for: Uptake and distribution of carboxylated quantum dots in human mesenchymal stem cells: cell growing density matters
Source: PubMed Central journal article supplement (PMC6417192; doi:10.1186/s12951-019-0470-6), 2019-03-13

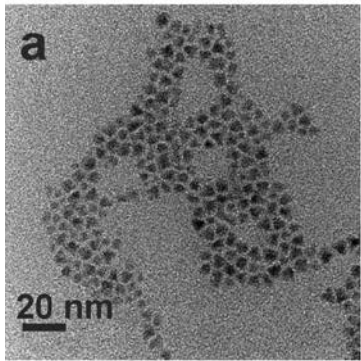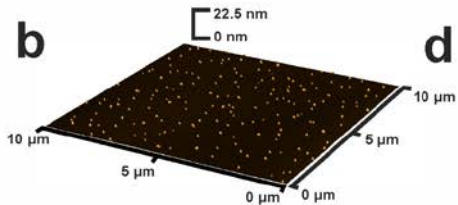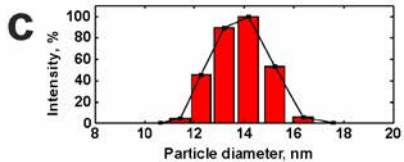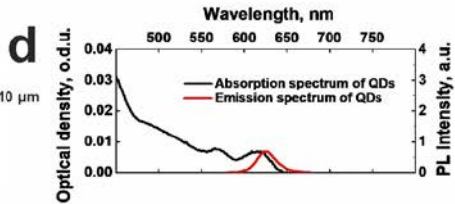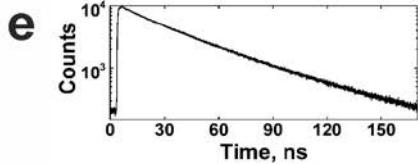

Supplement: 12951_2019_470_MOESM5_ESM.pdf [file 12951_2019_470_MOESM5_ESM.pdf]
